# Supplementary material for: The splicing factor RBM17 drives leukemic stem cell maintenance by evading nonsense-mediated decay of pro-leukemic factors
Source: PubMed Central journal article supplement (PMC9250932; doi:10.1038/s41467-022-31155-0), 2022-07-04
Supplement: 41467_2022_31155_MOESM1_ESM.pdf [file 41467_2022_31155_MOESM1_ESM.pdf]

## **The Splicing Factor RBM17 Drives Leukemic Stem Cell Maintenance by Evading Nonsense-mediated Decay of Pro-Leukemic Factors**

Lina Liu<sup>1,2,3,4</sup>, Ana Vujovic<sup>3,4</sup>, Nandan P. Deshpande<sup>5,6</sup>, Shashank Sathe<sup>7</sup>, Govardhan Anande<sup>5,6</sup>, He Tian Chen<sup>2,4</sup>, Joshua Xu<sup>2,4</sup>, Mark D. Minden<sup>3,4</sup>, Gene W. Yeo<sup>7</sup>, Ashwin Unnikrishnan<sup>5,6</sup>, Kristin J. Hope<sup>3,4,\*</sup>, and Yu Lu<sup>1,\*</sup>

<sup>1</sup> Department of Medicine, Faculty of Health Sciences, McMaster University, Ontario, Canada

<sup>2</sup> Department of Biochemistry and Biomedical Sciences, Faculty of Health Sciences, McMaster University, Ontario, Canada

<sup>3</sup> Department of Medical Biophysics, University of Toronto, Ontario, Canada

<sup>4</sup> Princess Margaret Cancer Centre, University Health Network, Ontario, Canada

<sup>5</sup> Adult Cancer Program, Lowy Cancer Research Centre, University of New South Wales, Sydney, Australia

<sup>6</sup> Prince of Wales Clinical School, University of New South Wales, Sydney, Australia

<sup>7</sup> Department of Cellular and Molecular Medicine, Stem Cell Program and Institute for Genomic Medicine, University of California at San Diego, California, United States

\* Authors contributed equally

Corresponding authors:

Kristin Hope ([kristin.hope@uhnresearch.ca](mailto:kristin.hope@uhnresearch.ca))

Yu Lu ([yu.lu@mcmaster.ca](mailto:yu.lu@mcmaster.ca))

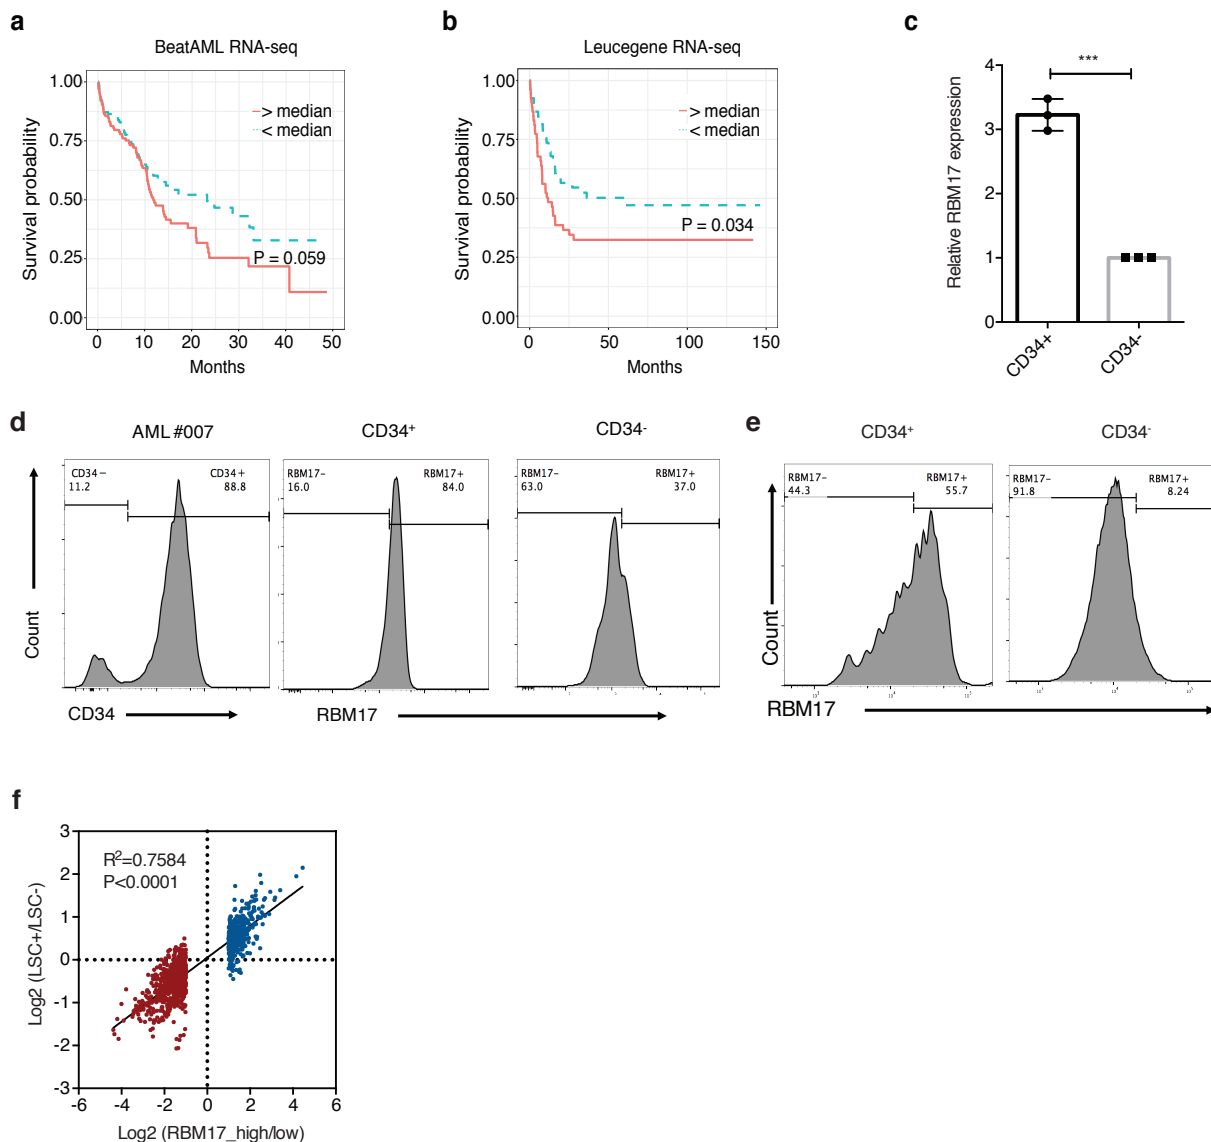

**Supplementary Fig. 1: Related to Fig. 1. RBM17 is preferentially expressed in primitive cell fraction of AML.**

(a-b) Kaplan Meier curves showing outcomes of AML patients from the BeatAML dataset (a) and Leucegene dataset (b) with above vs below median expression of *RBM17*. P value was assessed using log-rank test. (c) *RBM17* transcript level in the primitive CD34+ vs the committed CD34- subsets in OCI-AML-8227 cells measured by qRT-PCR.  $n=3$ , mean  $\pm$  SD, two-tailed Student's *t* test. (d) One representative primary AML sample (#007) with intracellular flow cytometry plots showing expression profile of CD34 (left) and percentage of *RBM17*+ cells in CD34+ and CD34- fractions of this AML sample (right). (e) Intracellular flow cytometry plots showing expression profile of *RBM17*+ cells in CD34+ and CD34- fractions of OCI-AML-8227 cells. (f) Correlation analysis showing fold changes ( $\log_2$ ) of 832 differential expressed genes identified from *RBM17*-higher AML cases versus *RBM17*-low cases in *RBM17*-high/low AML patients (x axis) and in LSC/non-LSC subsets of 78 AML patients (y axis). Correlation coefficient  $R^2$  and P value were calculated based on Pearson's correlation test, two-tailed.

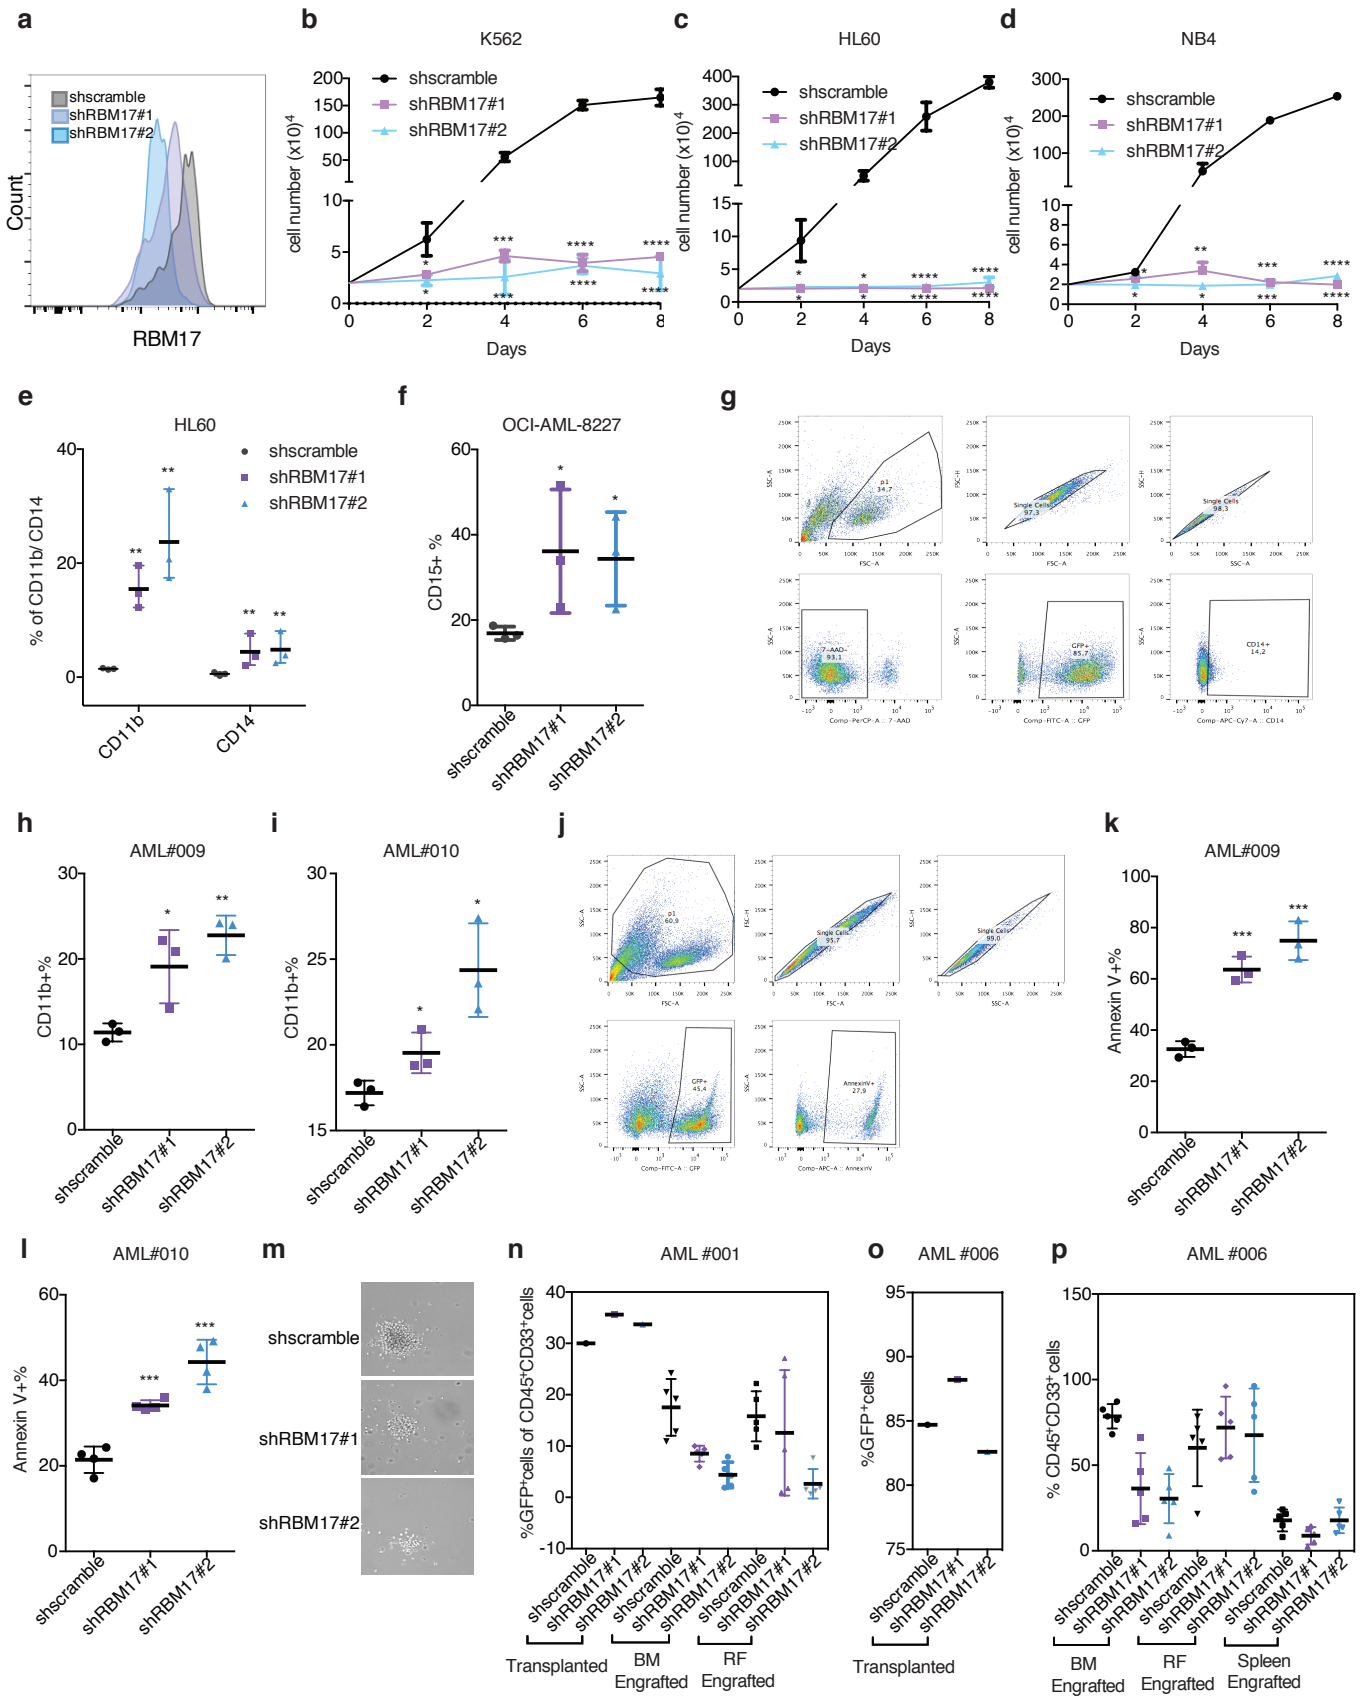

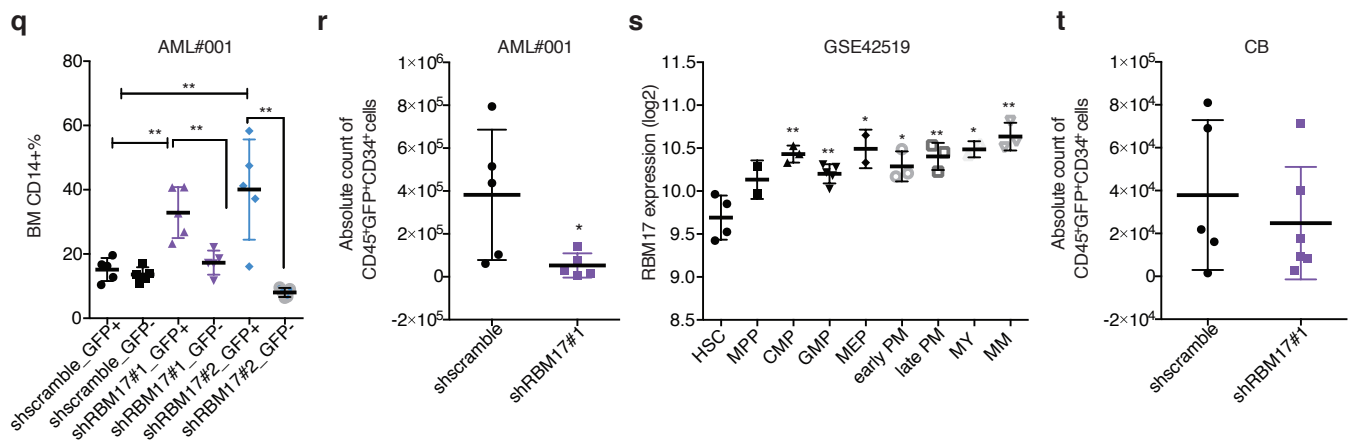

**Supplementary Fig. 2: Related to Fig. 2. RBM17 supports AML cell proliferation and inhibits AML cell differentiation.** (a) Flow cytometry validation of *RBM17* knockdown in CD34<sup>+</sup> OCI-AML-8227 cells using shRBM17#1 and shRBM17#2. (b-d) Growth curves of transduced K562, HL60 and NB4 cells with *RBM17* knockdown and control lentivirus.  $n=3$ , mean  $\pm$  SD. For each time point, knockdown groups are compared with the control shscramble group using two-tailed Student's *t* test. (e-i) Assessment of the effects of *RBM17* knockdown on myeloid differentiation of HL60 cells (e), OCI-AML-8227 cells (P(shscramble vs shRBM17#1)=0.0324, P(shscramble vs shRBM17#2)=0.0109) (f) and two primary AML samples (h-i) as compared to control shRNA.  $n=3$ , mean  $\pm$  SD, two-tailed Student's *t* test. (g) One representative gating strategy applied to immunophenotyping assays, corresponding to figure 2b, 6f, supplementary figure 2e-f, 2h-i and supplementary figure 5d. (j) One representative gating strategy applied to Annexin V detection assay, corresponding to figure 2c, 6g, supplementary figure 2k-l and supplementary figure 5e-g. (k-l) Flow cytometry analysis of AnnexinV signal in primary AML cells on day 7 following knockdown of *RBM17*, mean  $\pm$  SD, two-tailed Student's *t* test. AML#009:  $n=3$ , P(shscramble vs shRBM17#1)=0.0008, P(shscramble vs shRBM17#2)=0.0008. AML#010:  $n=4$ , P(shscramble vs shRBM17#1)=0.0003, P(shscramble vs shRBM17#2)=0.0003. (m) Example of colonies derived from primary AML cells transduced with a scramble (control) or *RBM17*-targeting shRNA (#1,2). Cells were sorted on the basis of GFP positivity 2 days after viral transduction and colonies were scored 14 d after plating in methylcellulose. (n-p) Raw data of engraftment experiment performed in AML sample #001 and sample #006, assessing the impact of *RBM17* knockdown on their engraftment potential. For sample #001, the y-axis (%GFP<sup>+</sup> cells of CD45<sup>+</sup> CD33<sup>+</sup>) indicates % of shRNA-positive cells in injected and engraftment human leukemia cells (n); For sample #006, shRNA infection rates are over 80% when injected (o) and the y-axis (%CD45<sup>+</sup>CD33<sup>+</sup>) indicates engraftment human leukemia cells in bone marrow (BM), right femur (RF) and spleen (p).  $n=5$ , mean  $\pm$  SD, two-tailed Student's *t* test. (q) Immunophenotyping of myeloid differentiation in post-transplant grafts from sample#001 showing CD14 expression between GFP<sup>+</sup> and GFP<sup>-</sup> cells in *RBM17* knockdown groups and shscramble group.  $n=5$ , mean  $\pm$  SD, two-tailed Student's *t* test. (r) Quantitative analysis of shRBM17-transduced AML cells at the endpoint showing the absolute cell number of CD34<sup>+</sup> cells within positively engrafted mice compared to shscramble control mouse.  $n=5$ , mean  $\pm$  SD, two-tailed Student's *t* test,  $P=0.0446$ . (s) *RBM17* mRNA expression in normal hematopoietic cells (GSE42519). mean  $\pm$  SD, two-tailed Student's *t* test, P value was calculated as compared to HSC. (t) Quantitative analysis of shRBM17-transduced normal CD34<sup>+</sup>CD38<sup>-</sup> enriched HSCs at the endpoint showing the absolute cell number of CD34<sup>+</sup> cells within positively engrafted mice compared to shscramble control mouse.  $n=5$  (shscramble),  $n=6$  (shRBM17#1), mean  $\pm$  SD, two-tailed Student's *t* test. \* $P<0.05$ , \*\* $P<0.01$ , \*\*\* $P<0.001$ , \*\*\*\* $P<0.0001$ .

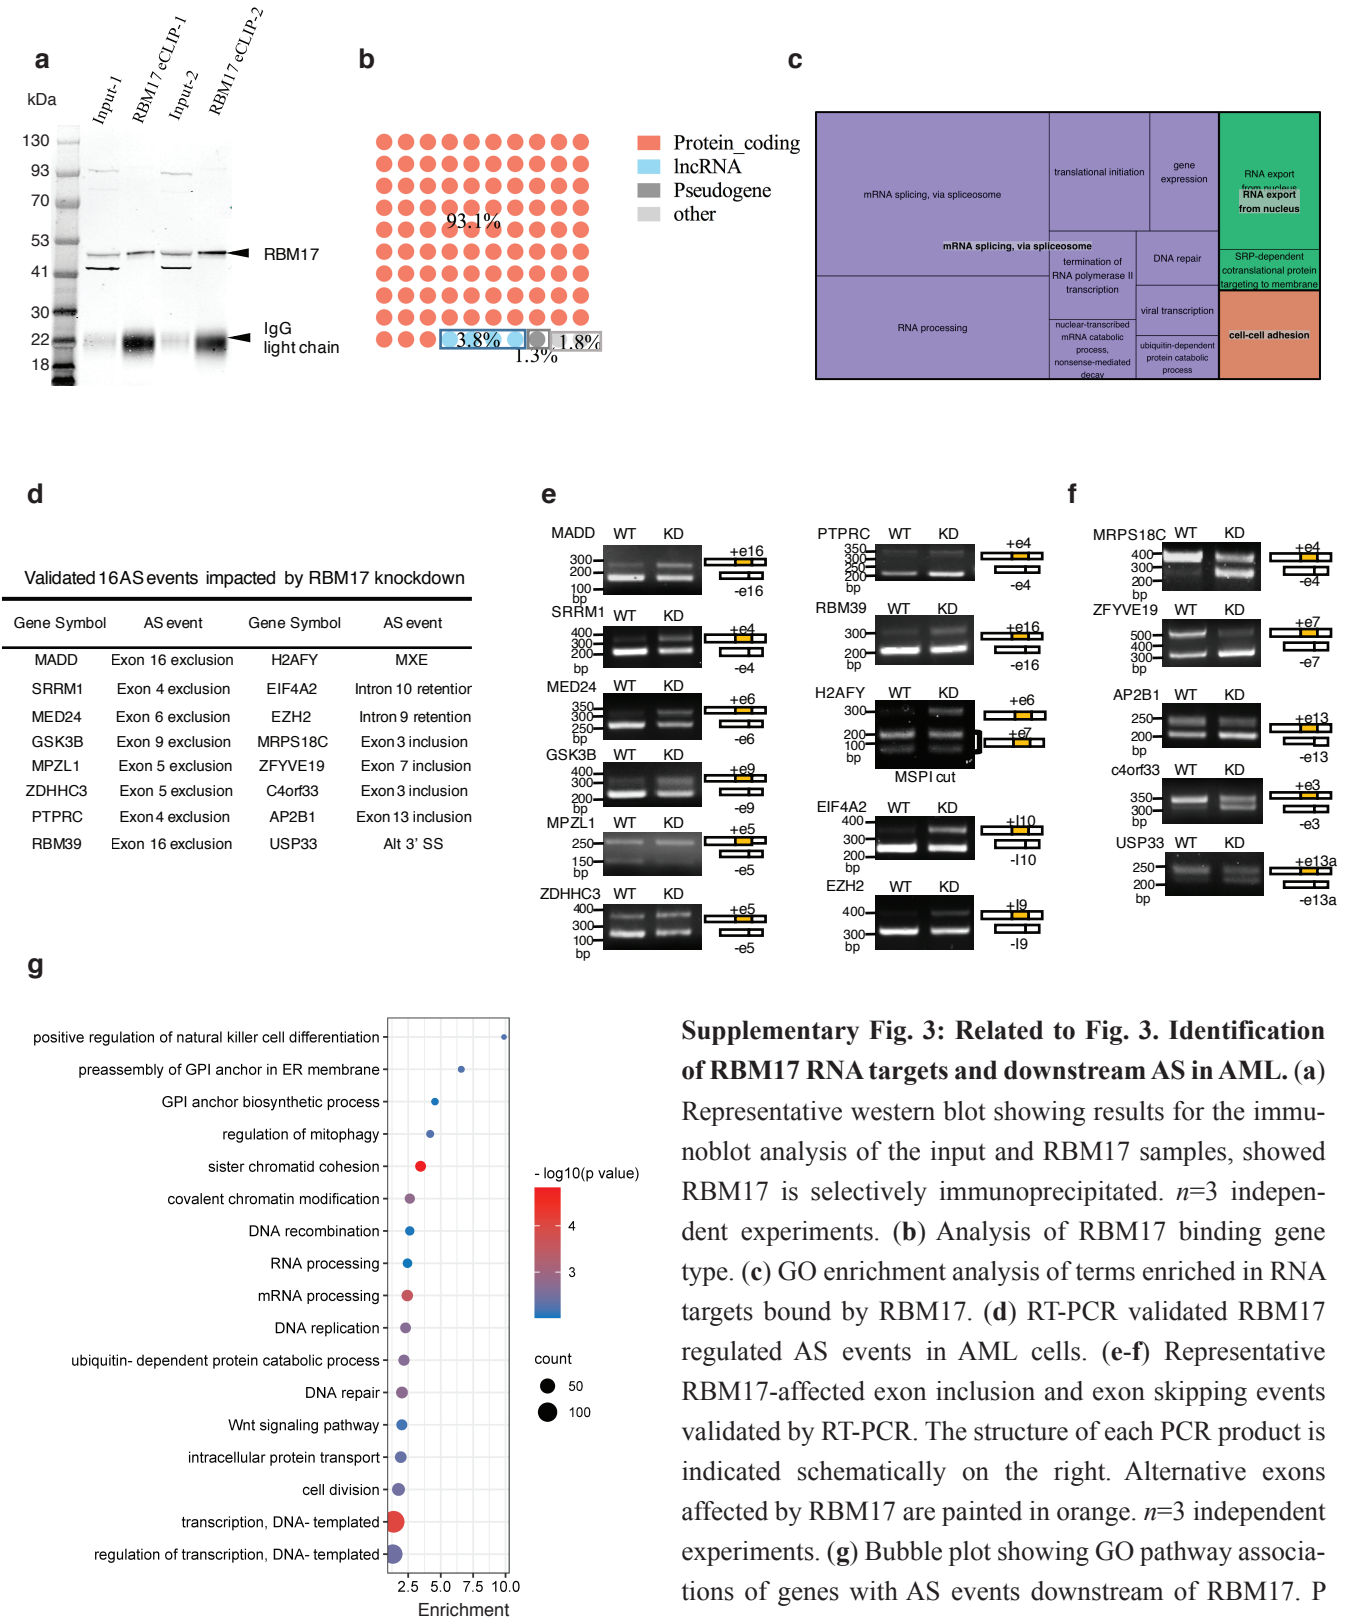

**Supplementary Fig. 3: Related to Fig. 3. Identification of RBM17 RNA targets and downstream AS in AML. (a)** Representative western blot showing results for the immunoblot analysis of the input and RBM17 samples, showed RBM17 is selectively immunoprecipitated.  $n=3$  independent experiments. **(b)** Analysis of RBM17 binding gene type. **(c)** GO enrichment analysis of terms enriched in RNA targets bound by RBM17. **(d)** RT-PCR validated RBM17 regulated AS events in AML cells. **(e-f)** Representative RBM17-affected exon inclusion and exon skipping events validated by RT-PCR. The structure of each PCR product is indicated schematically on the right. Alternative exons affected by RBM17 are painted in orange.  $n=3$  independent experiments. **(g)** Bubble plot showing GO pathway associations of genes with AS events downstream of RBM17. P value was calculated using modified Fisher's exact test. Source data are provided as a Source Data file.

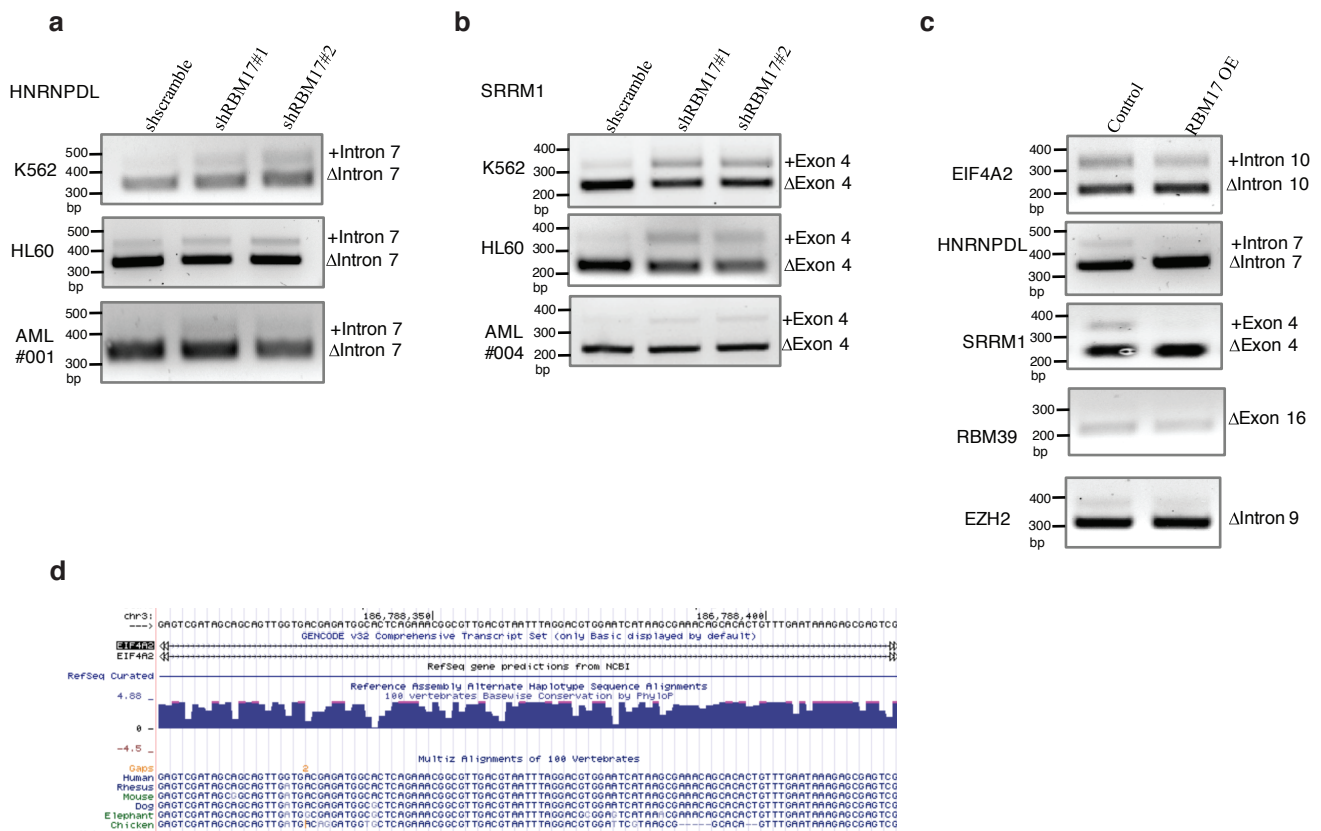

**Supplementary Fig. 4: Related to Fig. 5. RBM17 knockdown leads to the production of NMD sensitive transcripts.** (a-b) RT-PCR validation of *HNRNPDL* (a) and *SRRM1* (b) variants using RNA extracted from K562, HL60 and primary AML cells with and without *RBM17* knockdown.  $n=3$  independent experiments. (c) RT-PCR validation of *EIF4A2*, *HNRNPDL*, *SRRM1*, *RBM39* and *EZH2* variants using RNA extracted from K562 cells with and without *RBM17* overexpression.  $n=3$  independent experiments. (d) The conservation track obtained from the UCSC Genome Browser shows high conservation of *EIF4A2* “cryptic exon” with PTC and flanking intronic sequences. Source data are provided as a Source Data file.

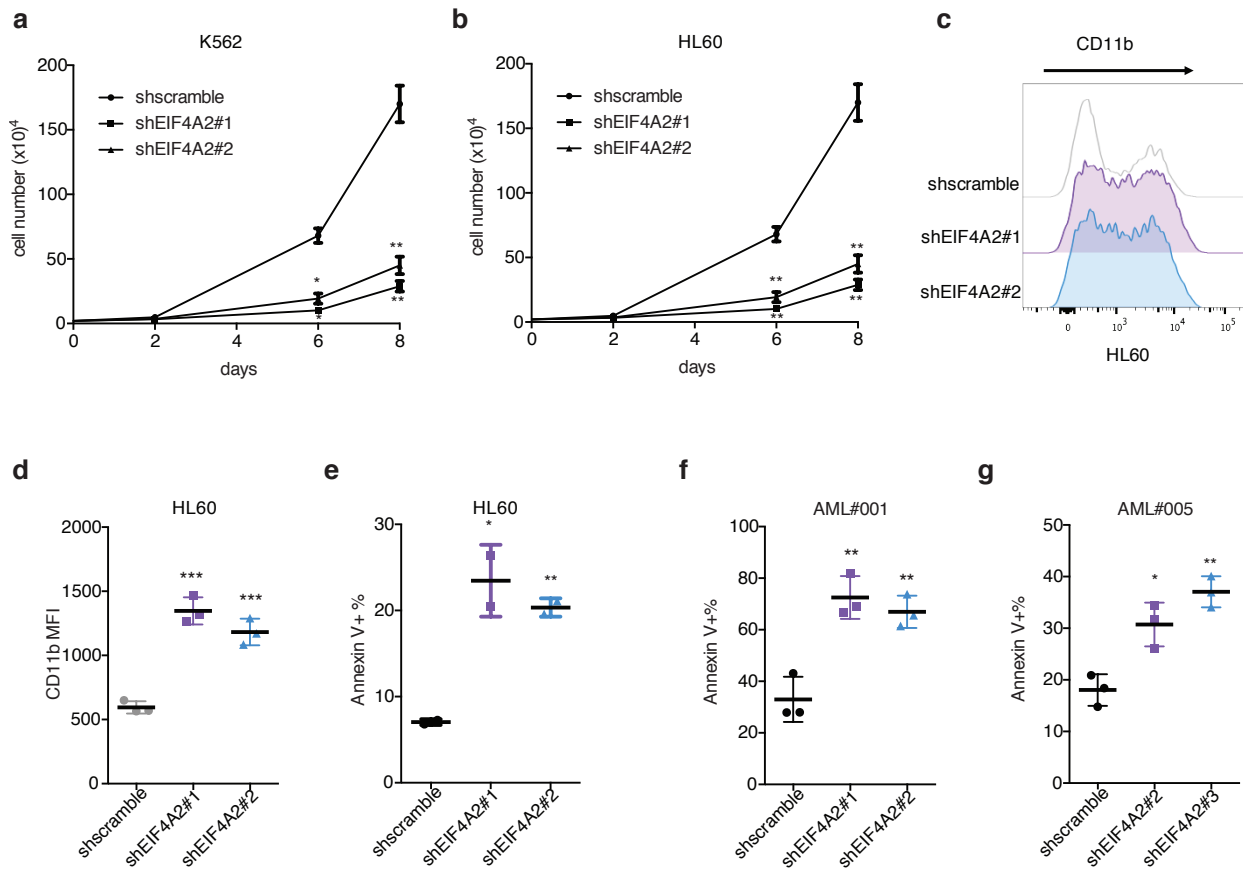

**Supplementary Fig. 5: Related to Fig. 6. EIF4A2 is required for AML cell survival.** (a-b) Assessment of the effects of *EIF4A2* knockdown on K562 (a) and HL60 (b) cell growth as compared to control shRNA cells. n=3, mean ± SD. For each time point, knockdown groups are compared with the control shscramble group using two-tailed Student's *t* test. (c-e) Flow cytometric evaluation of myeloid differentiation (P(shscramble vs shEIF4A2#1)=0.0004, P(shscramble vs shEIF4A2#2)=0.0009) (c-d) and apoptosis (P(shscramble vs shEIF4A2#1)=0.031, P(shscramble vs shEIF4A2#2)=0.0035) (e) following *EIF4A2* knockdown in HL60 cells. n=3, mean ± SD, two-tailed Student's *t* test. (f-g) Flow cytometric evaluation of apoptosis following *EIF4A2* knockdown in primary AML cells. n=3, mean ± SD, two-tailed Student's *t* test. \*P<0.05, \*\*P<0.01, \*\*\*P<0.001.

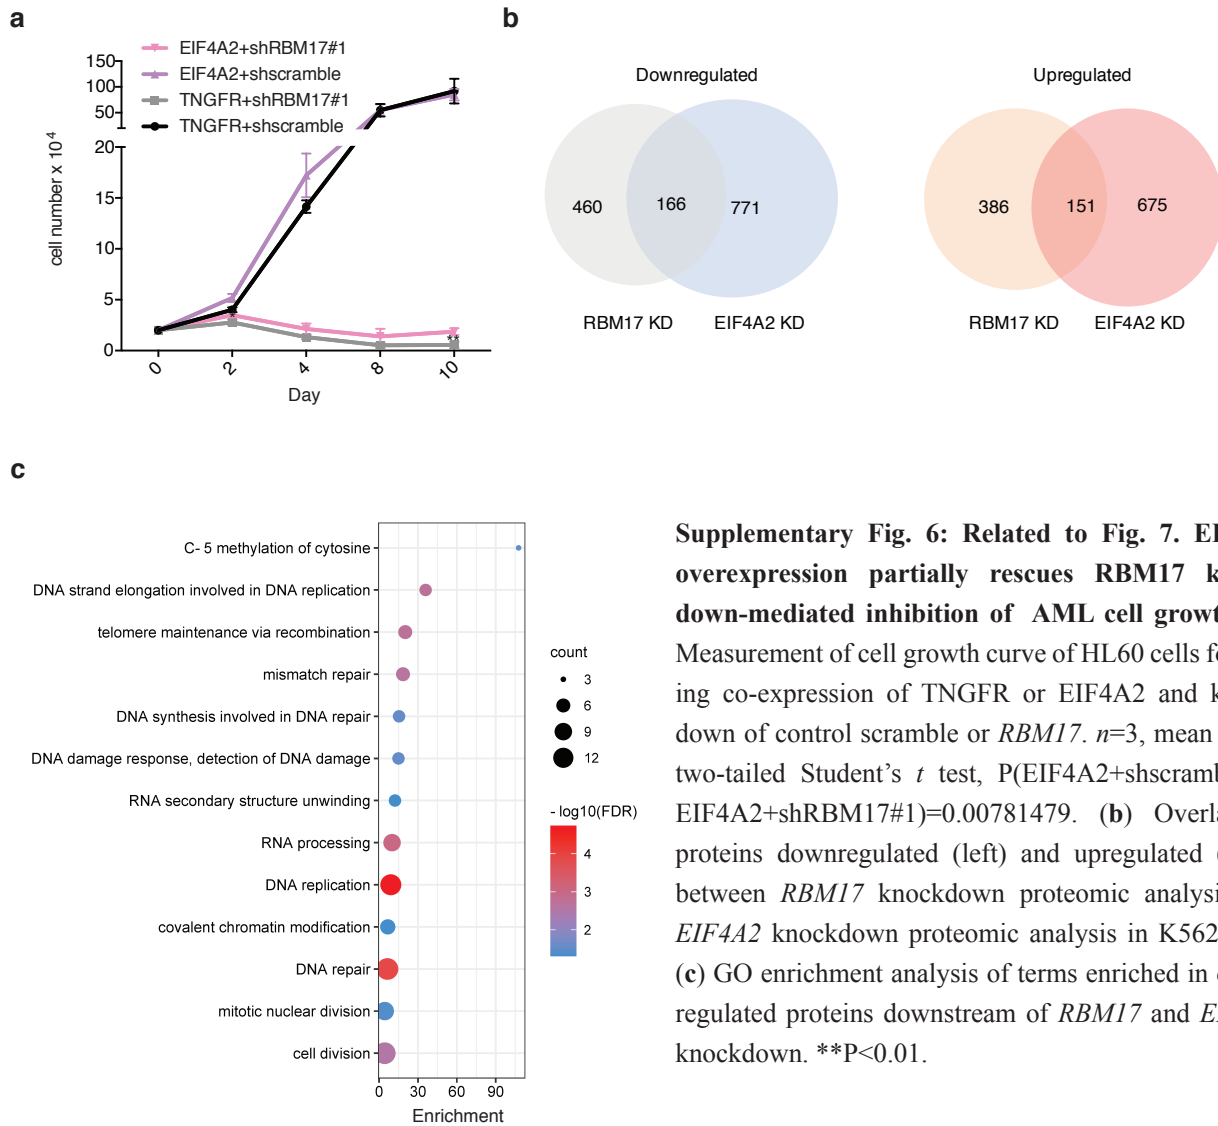



**Supplementary Table 1:  
Clinical characteristics of primary AML patient samples**

| <b>sample#</b> | <b>Diagnosis</b>                                            | <b>Cytogenetics</b>                   | <b>FAB subtype</b>                                      | <b>Additional molecular markers</b> |
|----------------|-------------------------------------------------------------|---------------------------------------|---------------------------------------------------------|-------------------------------------|
| 001            | De novo                                                     | 46,XY,ider(7)(q10)<br>del(7)(q21)[20] | M1                                                      | not done                            |
| 002            | De novo                                                     | NA                                    | M5                                                      | NA                                  |
| 003            | MDS, refractory<br>cytopenia with<br>multilineage dysplasia | 47,XY,+8[2]/46,<br>XY[20]             | NA                                                      | not done                            |
| 004            | AML, sub-type<br>unclassified                               | 47,XX,+8[14]                          | NA                                                      | FLT3-ITD                            |
| 005            | De novo                                                     | 46, XY[20]                            | M1                                                      | NA                                  |
| 006            | De novo                                                     | 46, XY[21]                            | M1                                                      | FLT3-ITD                            |
| 007            | De novo                                                     | 46, XY[20]                            | M1                                                      | not done                            |
| 008            | De novo                                                     | 47, XY[20]                            | M0                                                      | not done                            |
| 009            | De novo                                                     | 46, XY[20]                            | M4/M5-<br>myelomonocytic<br>with MDS related<br>changes | NPM1 and high FLT3-ITD              |
| 010            | Relapse                                                     | 46, XX[20]                            | Monocytic<br>differentiation<br>(favor M4)              | NPM1, FLT3-ITD<br>and FLT3-TKD      |

**Supplementary Table 2:  
GSEA of genes co-regulated with RBM17 in human AML**

| Go term                                 | SIZE | NES       | NOM p-val | FDR q-val   |
|-----------------------------------------|------|-----------|-----------|-------------|
| GO_RIBONUCLEOPROTEIN_COMPLEX_BIOGENESIS | 431  | 2.0012367 | 0         | 0.021558888 |
| GO_RIBOSOMAL_LARGE_SUBUNIT_BIOGENESIS   | 72   | 2.0189736 | 0         | 0.023335185 |
| GO_DESMOSOME                            | 24   | 2.0468068 | 0         | 0.024645623 |
| GO_GOLGI_CIS_CISTERNA                   | 24   | 1.9186343 | 0         | 0.027782617 |
| GO_TRNA_METHYLATION                     | 40   | 1.920206  | 0         | 0.029331803 |
| GO_RNA_METHYLATION                      | 82   | 1.9078909 | 0         | 0.030454688 |
| GO_MATURATION_OF_LSU_RRNA               | 27   | 1.9297539 | 0         | 0.030612184 |
| GO_TRNA_METHYLTRANSFERASE_ACTIVITY      | 34   | 1.923328  | 0         | 0.030679988 |
| GO_RIBOSOME_BIOGENESIS                  | 300  | 1.931395  | 0         | 0.034042753 |
| GO_AXON_INITIAL_SEGMENT                 | 16   | 1.9620454 | 0         | 0.035222724 |
| GO_PRERIBOSOME                          | 75   | 1.8922114 | 0         | 0.038252123 |
| GO_RNA_METHYLTRANSFERASE_ACTIVITY       | 67   | 1.9330649 | 0         | 0.038755246 |
| GO_VOLTAGE_GATED_SODIUM_CHANNEL_COMPLEX | 17   | 1.9355748 | 0         | 0.044540383 |
| GO_SPLICEOSOMAL_COMPLEX_ASSEMBLY        | 59   | 1.8475881 | 0         | 0.04826988  |

**Supplementary Table 3: RT-PCR primer sequences**

| Target genes | Forward primer (5'-3') | Reverse primer (5'-3') |
|--------------|------------------------|------------------------|
| MADD         | AACTCCACCGTCTCCAACAC   | CACTAACGCCCTCCTGTTTC   |
| SRRM1        | ACGGAAATCCTTGGGTTTGA   | AGGAAAGCAGAAGGGATTCCC  |
| MED24        | CACGGCAAAGCAGAGGAATG   | AATGCTCGATGGCAGTCCAA   |
| GSK3B        | CCTGGGAACCTCAACAAGGG   | AAGAGTGCAGGTGTGTCTCG   |
| EIF4A2       | GGTCAGGGTCAAGTCGTGTT   | TGGGCATCTCCTCCACTGTA   |
| EZH2         | TCATGCAACACCCAACACTT   | AGAGGAGCTCGAAGTTTCATCT |
| MPZL1        | AGCATGATTCTGGCTGCCT    | GGATATCCGCATACACCACA   |
| ZDHHC3       | ACTGTCCCTGGGTCAACAAC   | GTGGAGAGAAGGAGCTGCAC   |
| PTPRC        | GTATTTGTGACAGGGCAAAGC  | AGAGTGGTTGTTTCAGAGGCA  |
| H2AFY        | GACGGCTTACAGTCCTCTC    | TCCAAGGGCCCGTCTTTTT    |
| RBM39        | CAAGTTGAGCAGTGCCAACG   | ATCTCGACTTCTTGAGCGGC   |
| MRPS18C      | TTGCTGTTTGCAGTGGTCTA   | TGTAAGTGGCATAAACCCCAT  |
| ZFYVE19      | CAGAGATAGAGGCACGGCTG   | GCAGGACTCTTTGGATGGCT   |
| C4orf33      | TGCTCCATTTTTCAGGGATCCT | TGCTCCATTTTTCAGGGATCCT |
| USP33        | TGTCTGACTTGTGACAGGGTG  | GCAAGGTTACTACTGGACCCC  |
| AP2B1        | AATGTGCCACAGGTGTCCTC   | ATATCCACCAGGTGCCATGC   |
| HNRNPDL      | ATCTCGAGGGGGTGGCAAT    | AGTACCTGACGCAGAAAAGCA  |

**Supplementary Table 4: Oligonucleotides used for cloning**

| Gene name   | Forward primer (5'-3')                                         | Reverse primer (5'-3')                                         |
|-------------|----------------------------------------------------------------|----------------------------------------------------------------|
| shEIF4 A2#1 | CCGGAGGCGATCACAACGTGCATTGCTCGAGCAATG<br>CACGTTGTGATCGCCTTTTTTG | AATTCAAAAAGGCGATCACAACGTGCATTGCTCGA<br>GCAATGCACGTTGTGATCGCCT  |
| shEIF4 A2#2 | CCGGGCCAGAGACTTCACAGTTTCTCTCGAGAGAAA<br>CTGTGAAGTCTCTGGCTTTTTG | AATTCAAAAAGCCAGAGACTTCACAGTTTCTCTCGAG<br>AGAAACTGTGAAGTCTCTGGC |
| shUPF 1#1   | CCGGTTACCTTGGTGACGAGTTTAACTCGAGTTAAAC<br>TCGTCACCAAGGTAATTTTTG | AATTCAAAAATTACCTTGGTGACGAGTTTAACTCGAG<br>TTAAACTCGTCACCAAGGTAA |
| shUPF 1#2   | CCGGAGATATGCCTGCGGTACAAAGCTCGAGCTTTG<br>TACCGCAGGCATATCTTTTTTG | AATTCAAAAAGATATGCCTGCGGTACAAAGCTCGA<br>GCTTTGTACCGCAGGCATATCT  |
| shLuci      | CCGGCGCTGAGTACTTCGAAATGTCCTCGAGGACAT<br>TTCGAAGTACTCAGCGTTTTTg | AATTCAAAAACGCTGAGTACTTCGAAATGTCCTCGA<br>GGACATTTCGAAGTACTCAGCG |
| EGFP        | CGCGGATCCATGGTGAGCAAGGGCGAGGA                                  | CGGGGTACCTTACTTGTACAGCTCGTCCA                                  |
| EIF4A2      | CGCGGATCCaccATGTCTGGTGGCTCCGCG                                 | CGCGGATCCTTAAATAAGGTCAGCCACATTC                                |

**Supplementary Table 5: qPCR primer sequences**

| Target gene                      | Forward primer (5'-3') | Reverse primer (5'-3') |
|----------------------------------|------------------------|------------------------|
| UPF1                             | AATTTGGTTAAGAGACATGCGG | TCAGGGACCTTGATGACGTG   |
| 18srRNA                          | GTAACCCGTTGAACCCATT    | CCATCCAATCGGTAGTAGCG   |
| EIF4A2_Intron10 included isoform | TAGCAGCAGTTGGTGACGAG   | CGACTCGCTCTTTATTCAAACA |
| EIF4A2_Intron10 skipped isoform  | TATTCACAGAATTGGCAGAGG  | TGGGCATCTCCTCCACTGTA   |
| RBM17                            | TGAGCGAGAGAGGAGGAAAA   | CCATGTTAGCGAGGAAGGAG   |
