# Supplementary material for: The splicing factor RBM17 drives leukemic stem cell maintenance by evading nonsense-mediated decay of pro-leukemic factors
Source: PubMed Central journal article supplement (PMC9250932; doi:10.1038/s41467-022-31155-0), 2022-07-04
Supplement: 41467_2022_31155_MOESM2_ESM.pdf [file 41467_2022_31155_MOESM2_ESM.pdf]

## **Description of Additional Supplementary Files**

File Name: Supplementary Data 1

Description: AML prognostic P values, LSC+/LSC- P values and average expressions in LSC+ versus LSC- of 203 mRNA splicing factors. Related to Figure 1.

File Name: Supplementary Data 2

Description: 866 significantly enriched reproducible binding peaks for RBM17 in the genome identified from RBM17 eCLIP-seq in K562 cells. Related to Figure 3.

File Name: Supplementary Data 3

Description: Differentially spliced events in K562 cells treated with shRBM17 versus control shscramble. Related to Figure 3.

File Name: Supplementary Data 4

Description: Splicing events directly bound by RBM17. Related to Figure 3.

File Name: Supplementary Data 5

Description: Coding potential and protein domain changes prediction of splicing events affected by RBM17 knockdown in K562 cells. Related to Figure 4.

File Name: Supplementary Data 6

Description: Differentially expressed proteins in K562 cells treated with shRBM17 versus control shscramble. Related to Figure 4.

File Name: Supplementary Data 7

Description: Proteins included in the EIF4A2\_KD\_DN and EIF4A2\_KD\_UP gene set. Related to Figure 7.

File Name: Supplementary Data 8

Description: Protein expression changes of 22 translation related factors in K562 cells with and without EIF4A2 knockdown or RBM17 knockdown. Related to Figure 7.
